# Supplementary material for: Low Temperature CO oxidation over Iron Oxide Nanoparticles Decorating Internal Structures of a Mesoporous Alumina
Source: PubMed Central journal article supplement (PMC5238452; doi:10.1038/srep40497), 2017-01-16
Supplement: srep40497-s1.pdf [file srep40497-s1.pdf]

# Supplementary Information

**Low temperature CO oxidation over iron oxide nanoparticles decorating internal structures of a mesoporous alumina**

**Il Hee Kim<sup>1</sup>, Hyun Ook Seo<sup>1\*</sup>, Eun Ji Park<sup>1</sup>, Sang Wook Han<sup>1</sup>, and Young Dok Kim<sup>12\*</sup>**

<sup>1</sup>Department of Chemistry, Sungkyunkwan University, Suwon, 440-746, Republic of Korea

<sup>2</sup>Research Center for Nanocatalysts, Korea Research Institute of Chemical Technology (KRICT), Daejeon 305-600, Republic of Korea

**Corresponding author**

\*E-mail: [ydkim91@skku.edu](mailto:ydkim91@skku.edu) (Y. D. Kim),  
[seo83@skku.edu](mailto:seo83@skku.edu) (H. O. Seo).

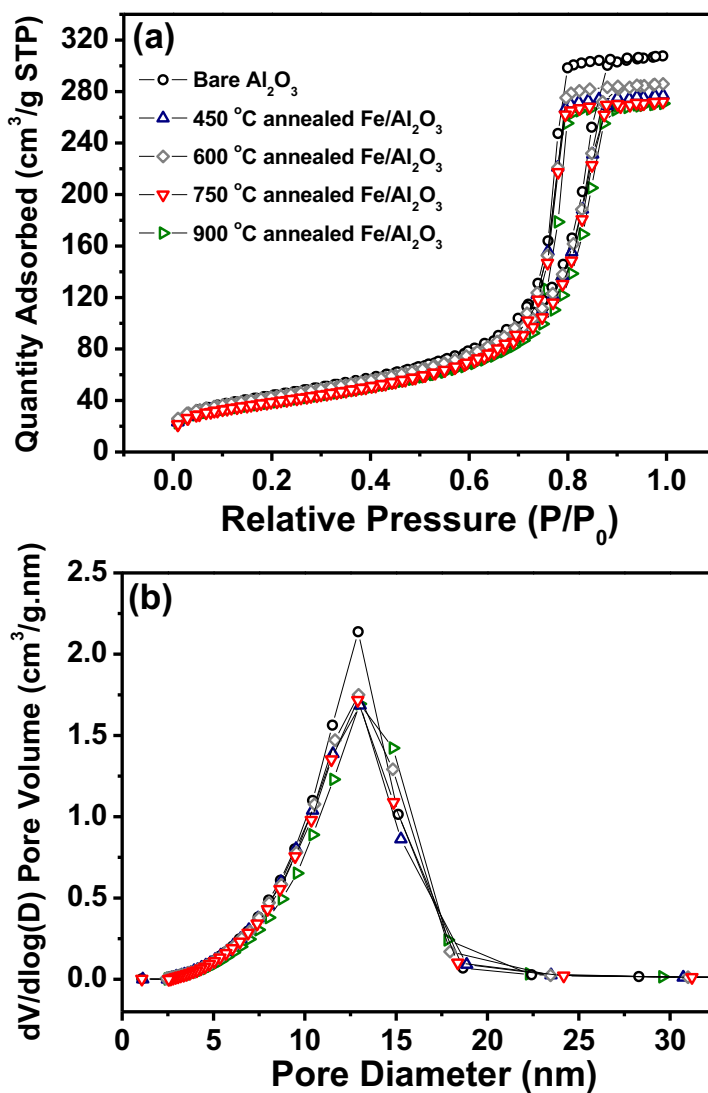

## Supplementary Figure 1.

(a) N<sub>2</sub> adsorption/desorption isotherm and (b) pore diameter distribution of bare Al<sub>2</sub>O<sub>3</sub>, Fe/Al<sub>2</sub>O<sub>3</sub> annealed at 450, 600, 750, and 900 °C. After Fe<sub>2</sub>O<sub>3</sub> deposition and post-annealing up to 900 °C, the porous structure of the samples did not showed significant changes.

|                                                                                      | Surface area<br>(m <sup>2</sup> /g) | Pore diameter<br>(nm) |
|--------------------------------------------------------------------------------------|-------------------------------------|-----------------------|
| Bare Al <sub>2</sub> O <sub>3</sub>                                                  | 158.0                               | 12.1                  |
| Fe <sub>2</sub> O <sub>3</sub> /Al <sub>2</sub> O <sub>3</sub> annealed at<br>450 °C | 146.4                               | 11.7                  |
| Fe <sub>2</sub> O <sub>3</sub> /Al <sub>2</sub> O <sub>3</sub> annealed at<br>600 °C | 151.8                               | 11.6                  |
| Fe <sub>2</sub> O <sub>3</sub> /Al <sub>2</sub> O <sub>3</sub> annealed at<br>750 °C | 139.2                               | 12.1                  |
| Fe <sub>2</sub> O <sub>3</sub> /Al <sub>2</sub> O <sub>3</sub> annealed at<br>900 °C | 137.8                               | 12.1                  |

### **Supplementary Table 1.**

Surface area and average pore diameter of bare Al<sub>2</sub>O<sub>3</sub>, Fe/Al<sub>2</sub>O<sub>3</sub> annealed at 450, 600, 750, and 900 °C.

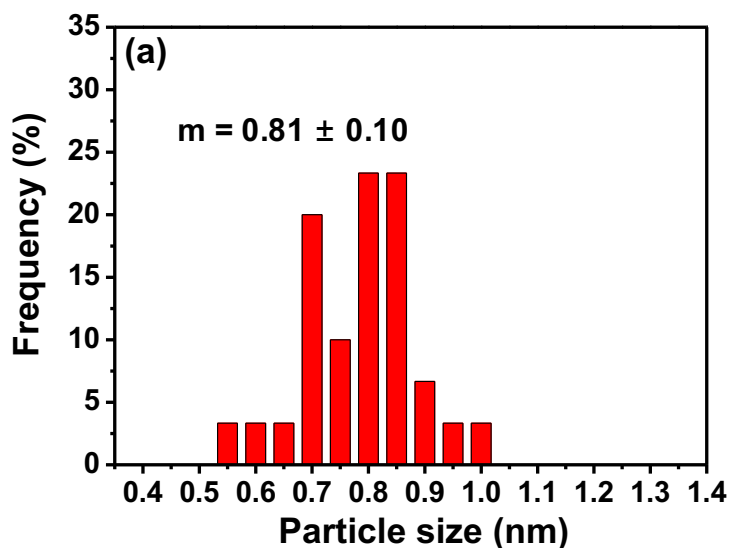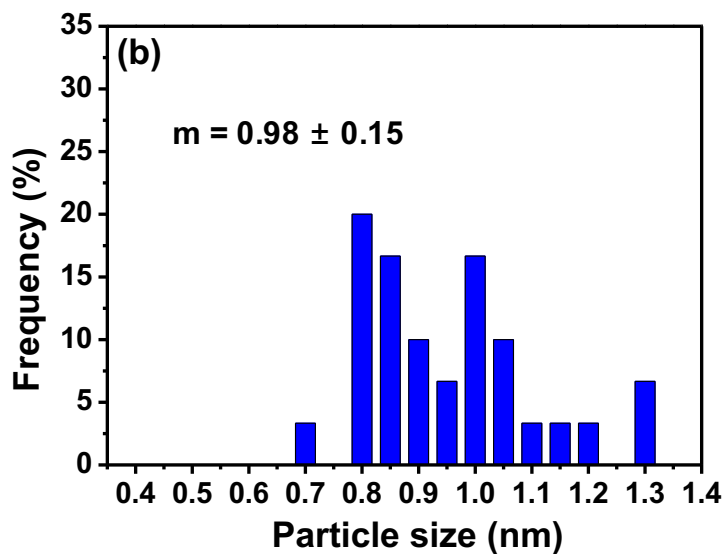

## Supplementary Figure 2.

Size distribution of  $\text{Fe}_2\text{O}_3$  nanoparticles on  $\text{Fe}_2\text{O}_3/\text{Al}_2\text{O}_3$  catalysts annealed at (a) 450 and (b) 750 °C.

Electron Image 4

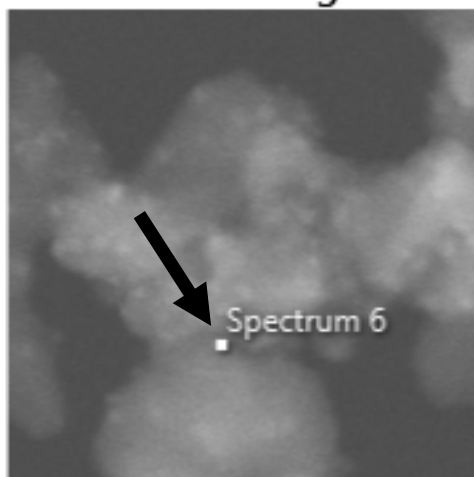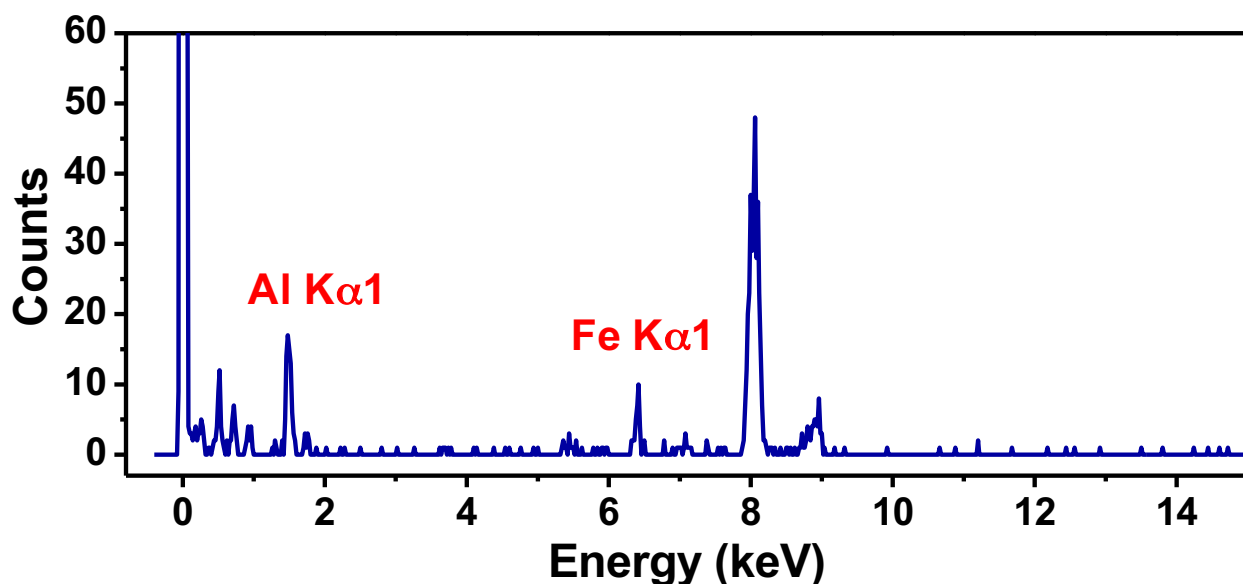

| Element | Line Type | k factor | Absorption Correction | Wt%    | Wt% Sigma | Atomic % |
|---------|-----------|----------|-----------------------|--------|-----------|----------|
| Al      | K series  | 1.06300  | 1.00                  | 55.43  | 6.47      | 72.02    |
| Fe      | K series  | 1.07637  | 1.00                  | 44.57  | 6.47      | 27.98    |
| Total:  |           |          |                       | 100.00 |           | 100.00   |

### Supplementary Figure 3.

The results of EDS (Energy dispersive spectroscopy) mapping of 750 °C-annealed Fe<sub>2</sub>O<sub>3</sub>/Al<sub>2</sub>O<sub>3</sub> catalyst. The area taken for EDS analysis is marked with white square dot guided by black arrow.

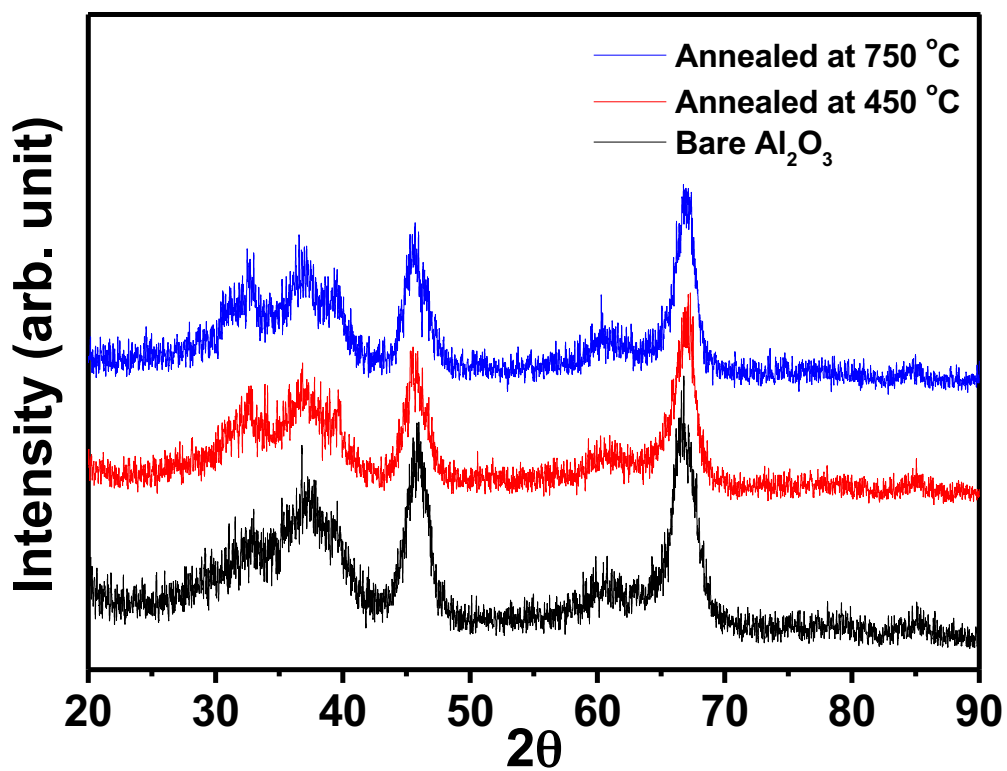

**Supplementary Figure 4.**

XRD pattern of bare  $\text{Al}_2\text{O}_3$ , Fe-deposited  $\text{Al}_2\text{O}_3$  annealed at 450 and 750 °C.

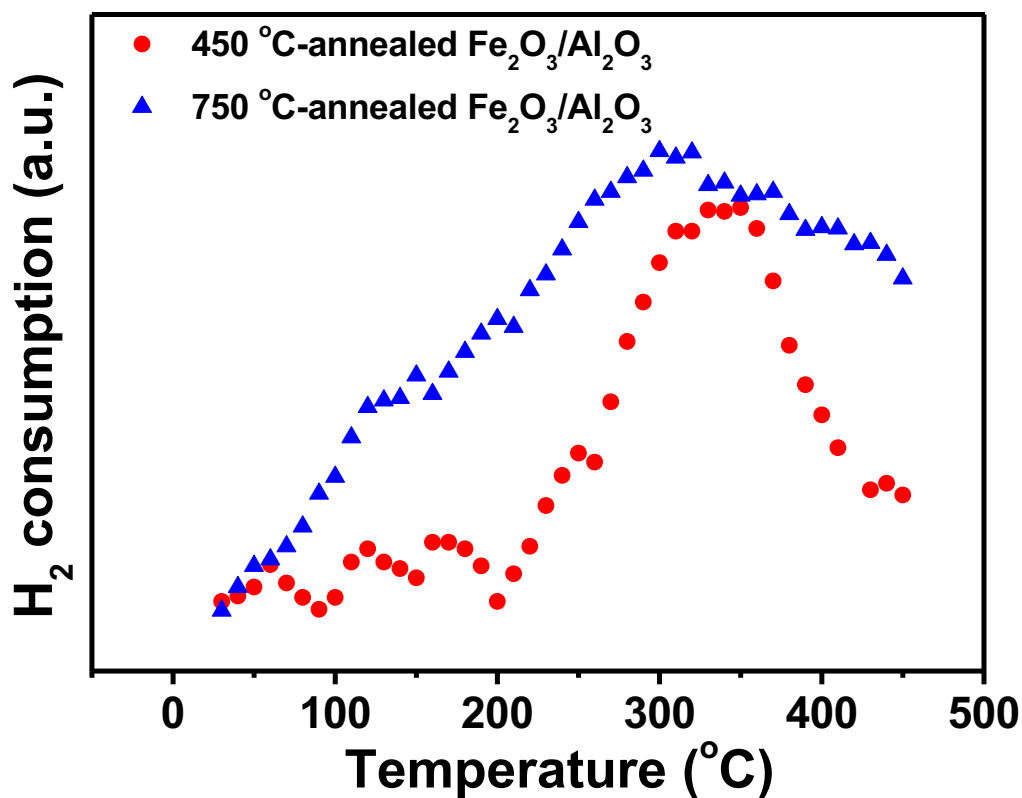

### Supplementary Figure 5.

The amount of H<sub>2</sub> uptake of two Fe<sub>2</sub>O<sub>3</sub>/Al<sub>2</sub>O<sub>3</sub> catalyst annealed at 450 and 750 °C during the H<sub>2</sub>-TPR experiments.

450 °C-annealed sample

750 °C-annealed sample

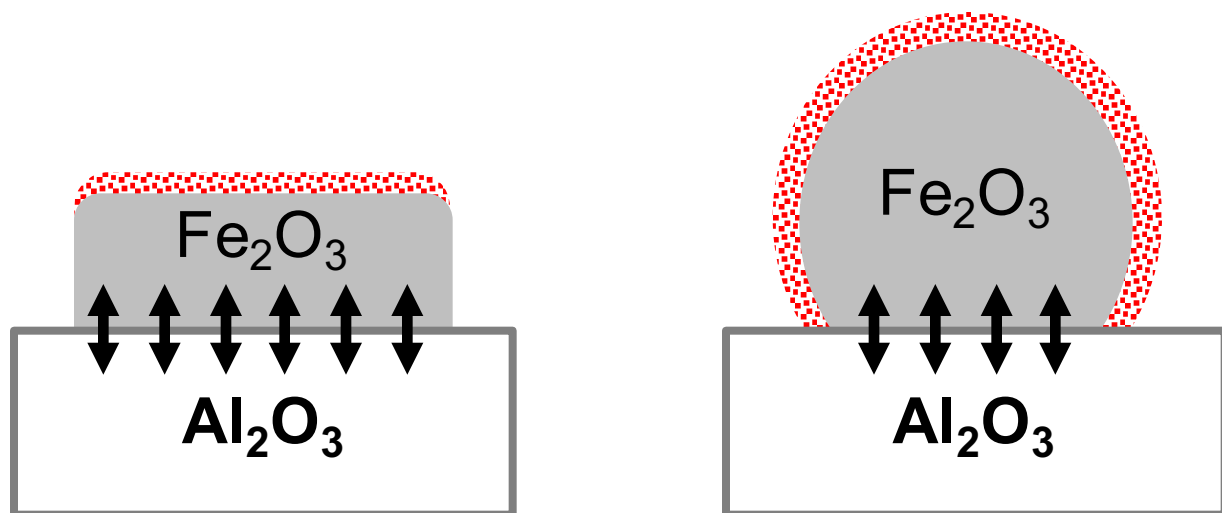

 : Surface state

 : Metal-support interaction

### Supplementary Figure 6.

The schematic descriptions of different degree of metal-support charge transfer and different portion of surface Fe (III) states to bulk Fe (III) states between two Fe<sub>2</sub>O<sub>3</sub>/Al<sub>2</sub>O<sub>3</sub> catalyst annealed at 450 and 750 °C, originating from the 3D growth of Fe<sub>2</sub>O<sub>3</sub> nanoparticles with increasing annealing temperature from 450 to 750 °C.



| Pre-annealing temperature | Fe/Al |
|---------------------------|-------|
| 450 °C                    | 0.53  |
| 600 °C                    | 0.44  |
| 750 °C                    | 0.37  |

**Supplementary Table 2.**

Fe/Al ratio on the surface as a function of post-annealing temperature determined by XPS

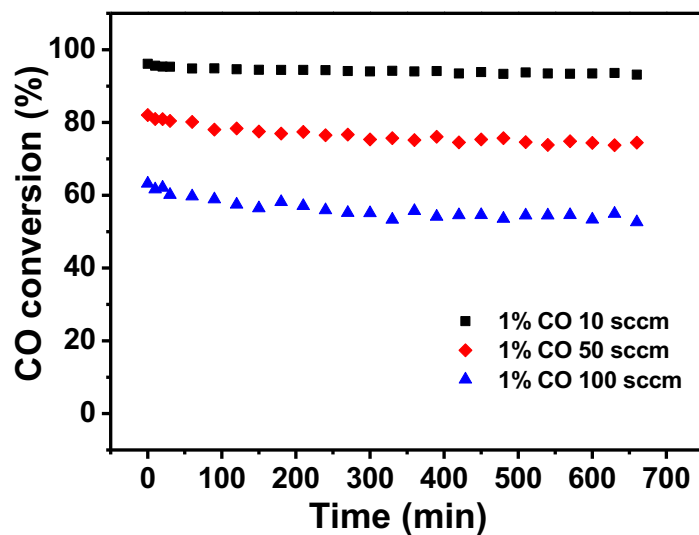

### Supplementary Figure 7.

CO conversion of  $\text{Fe}_2\text{O}_3/\text{Al}_2\text{O}_3$  with different space velocity of 1 % CO

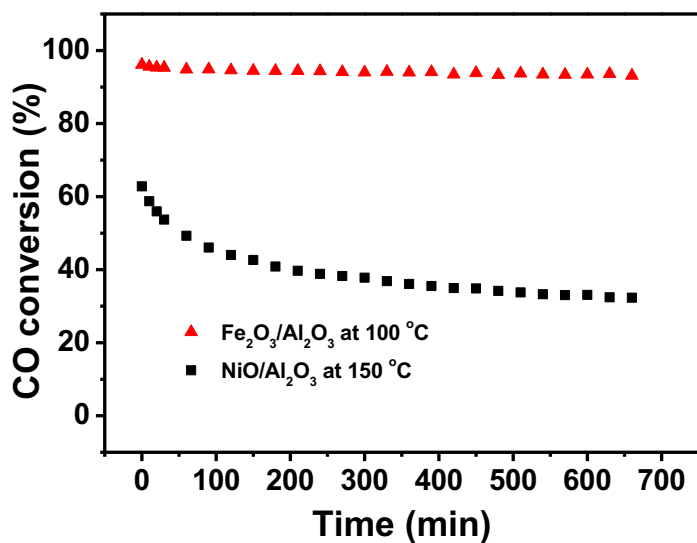

### Supplementary Figure 8.

Catalytic activity of Fe<sub>2</sub>O<sub>3</sub>/Al<sub>2</sub>O<sub>3</sub> (TR-CVD prepared) at 100 °C and NiO/Al<sub>2</sub>O<sub>3</sub> (ALD-prepared) at 150 °C. The flow rate of dry air containing 1 % CO was 10 ml/min for both experiments.

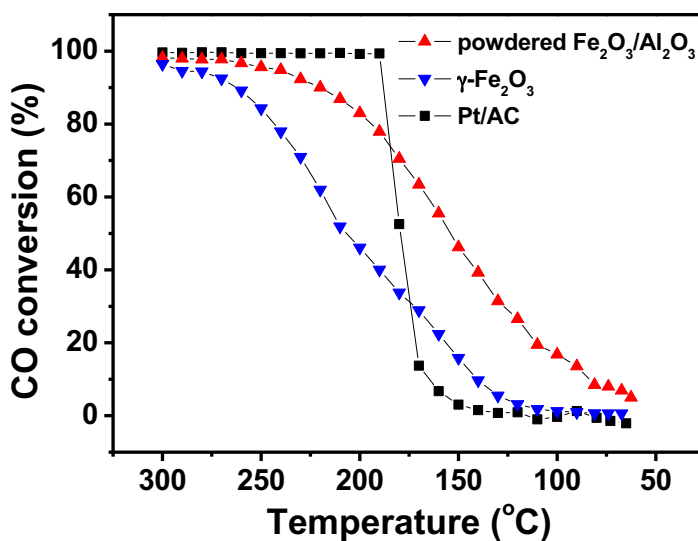

### Supplementary Figure 9.

Catalytic activity of powdered Fe<sub>2</sub>O<sub>3</sub>/Al<sub>2</sub>O<sub>3</sub>, γ-Fe<sub>2</sub>O<sub>3</sub>, and Pt/AC as a function of reaction temperature. The amount of samples were adjusted in order to get equivalent specific area of active metal nanoparticles.

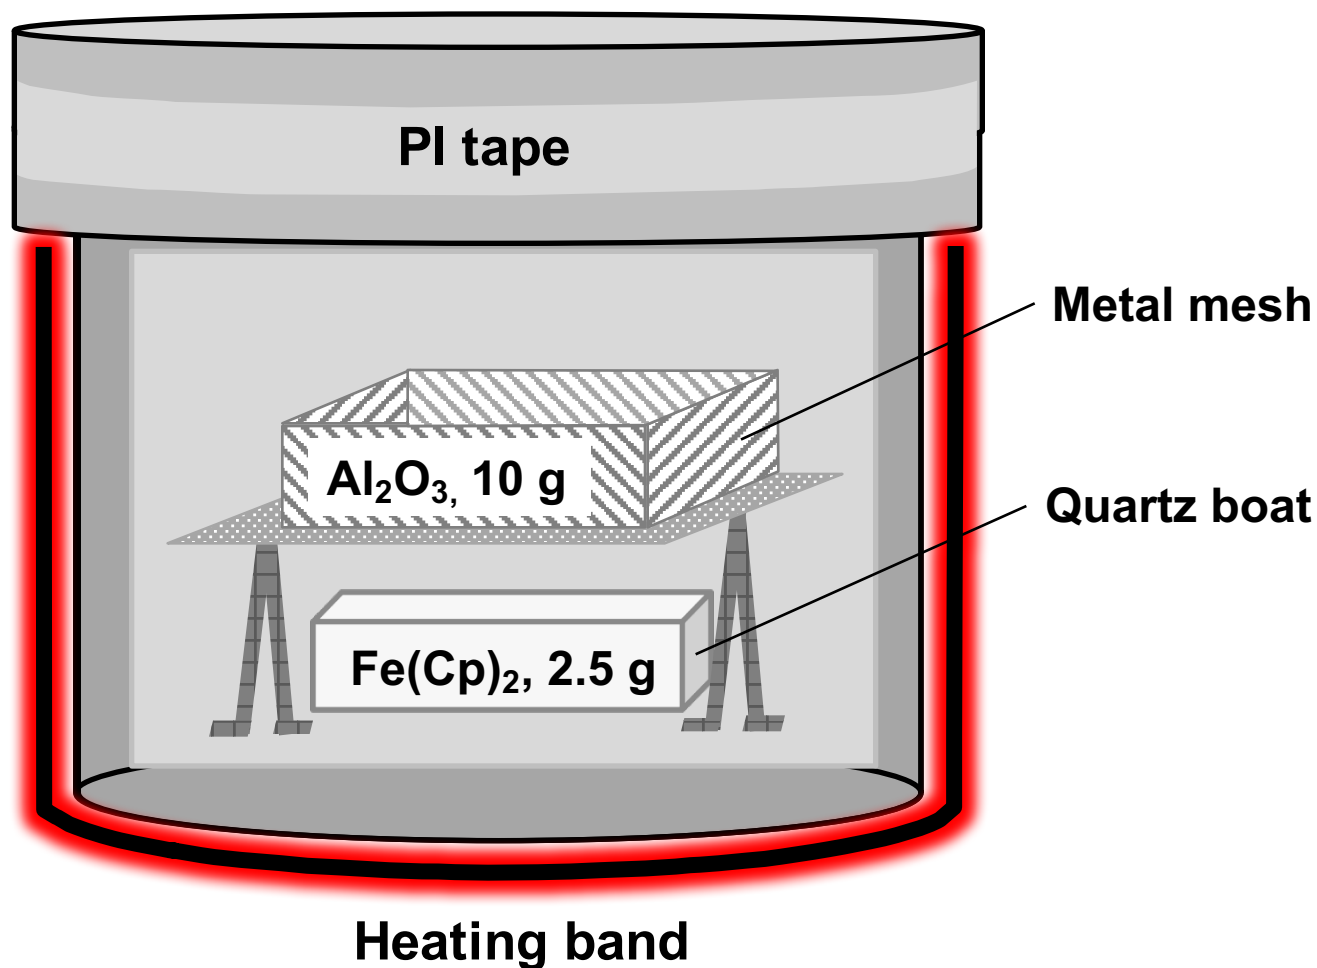

### Supplementary Figure 10.

A Schematic diagram of the experimental set-up of TR-CVD for sample preparation. The gap between the lid and the body of the chamber was sealed with polyimide (PI) film from the outside. The system was equipped with a thermocouple and heating jacket, wrapping the outside the chamber, for temperature control.

### **Conditions of the post-annealing of Fe<sub>2</sub>O<sub>3</sub>/Al<sub>2</sub>O<sub>3</sub> samples.**

Prior to the CO oxidation experiments, Fe<sub>2</sub>O<sub>3</sub>/Al<sub>2</sub>O<sub>3</sub> samples were annealed at four different temperatures (450, 600, 750 and 900 °C). Annealing process at 450, 600, and 750 °C were conducted for 2 hrs under dry air conditions (total flow of 30 ml/min) in the reactor. On the other hands, the annealing process at 900 °C were done under ambient conditions (outside of the glove box) for 2 hrs and then transferred into the reactor inside the glove box. Then, the 900 °C-annealed sample was thermally treated again at 750 °C before the CO oxidation experiment in the glove box.

### **Conditions of CO activity tests of two commercially available catalyst (Pt/Ac, Fe<sub>2</sub>O<sub>3</sub> nanopowder).**

0.45 g of Pt/AC, 0.041 g of  $\gamma$ -Fe<sub>2</sub>O<sub>3</sub>, and 0.11 g of ground Fe<sub>2</sub>O<sub>3</sub>/Al<sub>2</sub>O<sub>3</sub> were used for catalytic activity test. The powder catalysts were sandwiched using quartz wool and located in the middle of the quartz tube. Prior to CO oxidation experiment, the Pt/AC sample was annealed at 450 °C for 2 h under dry air condition (total flow of 30 ml/min), while  $\gamma$ -Fe<sub>2</sub>O<sub>3</sub>, and 0.11 g of ground Fe<sub>2</sub>O<sub>3</sub>/Al<sub>2</sub>O<sub>3</sub> samples were annealed at 750 °C under same conditions (2 hr, 30 ml/min of air flow). After the annealing processes, the reactor was cooled down to 300 °C, then the 1 % CO gas was fed into the reactor with flow rate of 10 ml/min. The temperature of the reactor was kept at 300 °C for 2 h, then cooled down to 50 °C with a constant cooling rate of 1 °C/min, and the CO oxidation activity was measured during the cooling process.

## Calculation of active sites on the surface of Fe<sub>2</sub>O<sub>3</sub>/Al<sub>2</sub>O<sub>3</sub> catalyst (2.0 g) for TOF estimation.

We assumed that the reaction was in thermodynamic controlled regime and TOF values were calculated using the number of consumed CO molecules (mol) averaged over the reaction time. For the calculation of the number of active sites of TR-CVD prepared Fe<sub>2</sub>O<sub>3</sub>/Al<sub>2</sub>O<sub>3</sub> catalyst, we assumed the hemispherical shape of Fe<sub>2</sub>O<sub>3</sub> nanoparticles on Al<sub>2</sub>O<sub>3</sub> substrate and 2 active sites per (200) plane of Fe<sub>2</sub>O<sub>3</sub>. In the below, we summarized the process of the calculation of active sites number together with important parameters used for the calculation.

| Value                                                                                                                                         | Estimated number                          | Determined by                                                                                                                                                                                                               |
|-----------------------------------------------------------------------------------------------------------------------------------------------|-------------------------------------------|-----------------------------------------------------------------------------------------------------------------------------------------------------------------------------------------------------------------------------|
| The weight percent of Fe atoms in Fe <sub>2</sub> O <sub>3</sub> /Al <sub>2</sub> O <sub>3</sub> .                                            | 5.39 wt%                                  | ICP-Mass                                                                                                                                                                                                                    |
| The weight of Fe atoms in 2.0 g of Fe <sub>2</sub> O <sub>3</sub> /Al <sub>2</sub> O <sub>3</sub> .                                           | 0.108 g                                   | the total weight of Fe <sub>2</sub> O <sub>3</sub> /Al <sub>2</sub> O <sub>3</sub> catalyst multiplied by the weight percent of Fe atoms in Fe <sub>2</sub> O <sub>3</sub> /Al <sub>2</sub> O <sub>3</sub> .                |
| The radius of Fe <sub>2</sub> O <sub>3</sub> nanoparticles                                                                                    | 0.5 nm                                    | TEM analysis                                                                                                                                                                                                                |
| Density of Fe <sub>2</sub> O <sub>3</sub>                                                                                                     | 5.242 g/cm <sup>3</sup>                   |                                                                                                                                                                                                                             |
| The unit cell area of Fe <sub>2</sub> O <sub>3</sub> (200) plane                                                                              | 0.706 nm <sup>2</sup>                     |                                                                                                                                                                                                                             |
| The volume of a Fe <sub>2</sub> O <sub>3</sub> particle                                                                                       | 2.618 x 10 <sup>-22</sup> cm <sup>3</sup> | the volume of a spherical particle of Fe <sub>2</sub> O <sub>3</sub> multiplied by 1/2                                                                                                                                      |
| The mass of a Fe <sub>2</sub> O <sub>3</sub> particle                                                                                         | 1.372 x 10 <sup>-21</sup> g               | the volume of a Fe <sub>2</sub> O <sub>3</sub> particle multiplied by density of Fe <sub>2</sub> O <sub>3</sub>                                                                                                             |
| The number of Fe <sub>2</sub> O <sub>3</sub> particles in 2.0 g of Fe <sub>2</sub> O <sub>3</sub> /Al <sub>2</sub> O <sub>3</sub>             | 1.123 x 10 <sup>20</sup>                  | the weight of Fe atoms in 2.0 g of Fe <sub>2</sub> O <sub>3</sub> /Al <sub>2</sub> O <sub>3</sub> divided by the mass of a Fe <sub>2</sub> O <sub>3</sub> particle                                                          |
| The surface area of a Fe <sub>2</sub> O <sub>3</sub> particle                                                                                 | 1.571 nm <sup>2</sup>                     | the surface area of a spherical particle of Fe <sub>2</sub> O <sub>3</sub> multiplied by 1/2                                                                                                                                |
| The total surface area of Fe <sub>2</sub> O <sub>3</sub> particles in 2.0 g of Fe <sub>2</sub> O <sub>3</sub> /Al <sub>2</sub> O <sub>3</sub> | 1.7641 x 10 <sup>20</sup> nm <sup>2</sup> | the surface area of a Fe <sub>2</sub> O <sub>3</sub> particle multiplied by the number of Fe <sub>2</sub> O <sub>3</sub> particles in 2.0 g of Fe <sub>2</sub> O <sub>3</sub> /Al <sub>2</sub> O <sub>3</sub>               |
| The number of unit cell of Fe <sub>2</sub> O <sub>3</sub> (200) plane                                                                         | 2.5 x 10 <sup>20</sup>                    | the total surface area of Fe <sub>2</sub> O <sub>3</sub> particles in 2.0 g of Fe <sub>2</sub> O <sub>3</sub> /Al <sub>2</sub> O <sub>3</sub> divided by the unit cell area of a Fe <sub>2</sub> O <sub>3</sub> (200) plane |
| The number of active sites on the surface of Fe <sub>2</sub> O <sub>3</sub> /Al <sub>2</sub> O <sub>3</sub> (2.0 g)                           | 5.0 x 10 <sup>20</sup>                    | the number of unit cell of Fe <sub>2</sub> O <sub>3</sub> (200) plane multiplied by the number of active sites per a unit cell of Fe <sub>2</sub> O <sub>3</sub> (200) plane                                                |
